# Supplementary material for: Incidence and Progression of Diabetic Retinopathy in American Indian and Alaska Native Individuals Served by the Indian Health Service, 2015-2019
Source: PubMed Central journal article supplement (PMC9999279; doi:10.1001/jamaophthalmol.2023.0167), 2023-03-09
Supplement: jamaophthalmol-e230167-s001.pdf [file jamaophthalmol-e230167-s001.pdf]

## **Data Sharing Statement**

### **Data**

**Data available:** No

### **Additional Information**

**Explanation for why data not available:** Generally, the Indian Health Service (which is the setting for this study) does not share patient datasets. This is due to mistrust and concern within the population it serves -- about research in general -- which in turn is due to history. A special exemption would need to be granted. At the moment, the IRB has not approved data sharing for this project.
